1

2

3 Observer-rated outcomes of Communication-Centered Treatment (CCT) for adults who stutter:

4

A preliminary study

5

6

7

8 Courtney T. Byrd<sup>1¶</sup>, Geoffrey A. Coalson<sup>1¶\*</sup>, Danielle Werle<sup>1¶</sup>

9

10 <sup>1</sup>Arthur M. Blank Center for Stuttering Education and Research, The University of Texas at

11 Austin, Austin, Texas, United States of America

12

13 \*Corresponding author

14 E-mail: [geoffrey.coalson@austin.utexas.edu](mailto:geoffrey.coalson@austin.utexas.edu)

15

16

17 ¶These authors contributed equally to this work.

18

## 19 **Abstract**

20 Previous studies have reported that adults who stutter demonstrate significant gains in  
21 communication competence, per self-ratings and clinician-ratings, upon completion of a  
22 communication-centered treatment, or CCT. The purpose of the present study was to determine  
23 whether gains in communication competence would also be reported by untrained observers.  
24 Eighty-one untrained observers completed an online survey that required each to view one of two  
25 videos depicting an adult who stutters during a mock interview recorded prior to CCT or after  
26 CCT. Participants were then asked to rate the communication competence of the interviewee on  
27 a 100-point visual analog scale and provide additional demographic information.  
28 Communication competence of the adult who stutters was rated significantly higher in their  
29 post-treatment video. Two observer-based factors were significantly associated with ratings of  
30 communication competence: years of education and years the respondent had known an adult  
31 who stutters. Upon controlling for these demographic factors, significantly higher ratings of  
32 communication competence for the post-treatment video were maintained. Although  
33 preliminary, findings suggest gains in communication competence demonstrated in previous  
34 studies through clinician and client observations are not limited to the sterile clinical  
35 environment, and further emphasizes the ecological validity of CCT. [*ClinicalTrials.gov*  
36 NCT05908123; <https://clinicaltrials.gov/show/NCT05908123>]

37

## 38 **Introduction**

39           Public perception that adults who stutter are poor communicators is pervasive. Decades  
40 of research illustrate the widespread belief that effective communication – a skill that is  
41 considered essential for academic success (e.g., [1]), workplace advancement (e.g., [2-5]), and  
42 interpersonal relationships (see [6-7]) – cannot be adequately attained in the presence of stuttered  
43 speech. Based on this assumption, treatment options for adults who stutter have historically  
44 focused, in part or whole, on learning to speak fluently, and concealing moments of overtly  
45 stuttered speech (see systematic review by Brignell et al. [8]). The assumption that  
46 communication skills cannot be gained or improved without suppressing stuttered speech has  
47 gone unchallenged within clinical trials for decades. Only recently have clinical researchers  
48 demonstrated that targeting fluency during treatment is not necessary to improve the  
49 communication competency of persons who stutter.

50           Byrd and colleagues [9-11], for example, explored the impact of participation in a  
51 *communication-centered treatment (CCT)* designed to improve communication skills with no  
52 attempt to change speech fluency. Participants were rated to be significantly stronger  
53 communicators post-treatment by clinicians who were unfamiliar with the participants and  
54 blinded to pre-/post-treatment status of video samples [9-10]. Participants themselves also  
55 reported significantly stronger communication competencies after treatment across a variety of  
56 speaking contexts (dyad, small group, large group, public presentation) and listeners (strangers,  
57 acquaintances, friends; Coalson et al. [11]). Critically, neither self- nor clinician ratings of  
58 communication competency were predicted by pre-treatment stuttering frequency.

59           Taken together, these clinical data provide preliminary but compelling evidence that  
60 fluency and communication are not inextricably linked, at least from the perspective of speakers

61 who stutter and their clinicians. Although promising, both the participants and the clinicians in  
62 the prior studies had shared knowledge of the nature of stuttering, the focus of CCT, and the  
63 desired clinical outcomes; thus, there was a relatively stable internal criteria for subjective  
64 evaluation, that one could argue may diverge from the appraisal of unfamiliar, untrained  
65 laypersons. Potential bias also may result from the sampling context. Clinicians who  
66 participated in the previous studies were blind to the pre- versus post-treatment status of videos,  
67 and videos were randomized, but they were evaluating a large number of consecutive videos  
68 depicting participants who stutter – a scenario rarely encountered in everyday life which may  
69 have also potentially compromised their ratings.

70         Therefore, to extend previous findings to a more ecologically valid context, the present  
71 study examined whether post-treatment gains in communication competency observed by  
72 clinicians in previous studies to reflect behavioral changes that are also identifiable to untrained,  
73 naïve observers. To do so, we recruited a large cohort of untrained observers to rate the  
74 communication competency of an unfamiliar adult who stutters based on a video sample  
75 recorded either before treatment had begun (Pre-treatment Video Stimuli) or after treatment had  
76 been completed (Post-treatment Video Stimuli). To explore implicit factors known or suspected  
77 to influence social evaluation, and evaluation of people who stutter (e.g., [12-13]) in particular,  
78 we also considered to what extent demographic and observer-related factors may account for  
79 perceived communication competency ratings for each video sample.

## 80 **Communication-Centered Treatment (CCT) for stuttering**

81         The majority of treatment approaches for adults who stutter primarily or exclusively  
82 targeted fluency-centered speech techniques intended to either eliminate or minimize moments

83 of stuttered speech (i.e., fluency shaping [14-15]; stuttering modification [16]). Yet, from the few  
84 randomized control trials (RCTs) that exist for adults who stutter, it is evident that fluency-  
85 centered treatment (a) has minimal impact on the psychological consequences of stuttering [17-  
86 18]), (b) is prone to high rates of relapse (71% [19]), and (c) may compromise the speaker's  
87 innate ability to communicate (e.g., unnatural, effortful, and/or incongruent with their identity  
88 [20]). Additionally, listeners often rate speech techniques often employed during treatment to  
89 achieve fluency as equally or less desirable than stuttered speech [21-23].

90 Furthermore, several recent studies indicate that stuttering severity does not predict  
91 communication attitudes in person who stutter regardless of age (e.g., children [24]; adults: [25]).  
92 These data challenge the assumption that fluency must be targeted to facilitate positive  
93 perspectives of self and/or communication in persons who stutter. In fact, Byrd and colleagues  
94 [9-11, 26-27] provide evidence that significant positive changes in communication attitudes, and  
95 communication competence, can be reliably attained through participation in a treatment that  
96 focuses on improving overall communication and *explicitly* excludes clinical goals that attempt  
97 to hide, eliminate, or modify stuttered speech in children and adults following CCT.

## 98 **Preliminary findings with children who stutter**

99 Byrd et al. [26, n = 23, ages 7- to 14-years old] examined changes in cognitive and  
100 affective wellbeing before and after treatment reported by 23 children and adolescents who  
101 stutter and their parents. Specifically, adolescents who stutter reported greater quality of life (as  
102 measured by the Overall Assessment of Speaker's Experience with Stuttering [28]) following  
103 treatment, and parents reported significant improvement in their child's ability to establish peer  
104 relationships (as measured by the PROMIS-Pediatric Short Form Peer Relationships Scale [29]).

105 A follow-up study by Byrd et al. [27] replicated these findings in an additional 23 child and  
106 adolescent participants (ages 7- to 14-years old). That is, participants and their parents reported  
107 significant post-treatment gains in quality of life and peer relationships. Combined, these  
108 findings indicate that treatment that excludes any attempt to modify speech fluency of children  
109 who stutter, and instead targets communication skills, results in significant gains that meet or  
110 exceed those previously reported for fluency-focused or stuttering modification treatment  
111 approaches.

112 Byrd et al. [9] extended analyses of their communication centered, whole person  
113 approach, by examining communication competencies in 37 children and adolescents who stutter  
114 (ages 4- to 17-years old) pre- versus post-treatment. An unfamiliar clinician rated pre- and post-  
115 treatment presentations (3 to 4 minutes in length), recorded in front of a large group of peers,  
116 based on nine difference communication skills: (1) language use, (2) language organization, (3)  
117 speech rate, (4) intonation, (5) volume, (6) gestures, (7) body position, (8) eye contact, and (9)  
118 facial affect (for detailed description, see Byrd et al. [9-10]). Findings provided preliminary  
119 evidence that, in addition to replicating the positive post-treatment changes in cognitive and  
120 affective aspects of stuttering reported in prior studies (Byrd et al. [26-27]), clinicians rated  
121 communication competency of children and adolescents who stutter during presentations as  
122 significantly stronger in samples recorded after treatment. Of particular relevance to the present  
123 study, these changes in communication competence following CCT were not significantly  
124 predicted by pre-treatment stuttering frequency.

## 125 **Preliminary findings with adults who stutter**

126 Positive post-treatment gains in communication competence after treatment reported for  
127 children who stutter have been replicated in adults who stutter who have participated in CCT.  
128 Coalson et al. [11] examined self-reported clinical outcomes from 33 adults who stutter after an  
129 11-week communication-centered treatment (for greater detail see Byrd et al. [10]) program  
130 similar to the one-week treatment program for children described in Byrd et al. [9, 26-27]).  
131 During the first and last week of treatment, participants completed the Self-Perceived  
132 Communication Competence [30] - a brief scale designed to self-assess communication skills in  
133 four specific communicative contexts (dyad, small group, large meeting, presentation) with three  
134 interlocutors (stranger, friend, acquaintance). Significant gains in self-rated communication  
135 competence were reported post-treatment across all 12 speaking scenarios and, similar to the  
136 children and adolescents who stutter in Byrd et al. [9], post-treatment gains were not predicted  
137 by stuttering frequency.

138 Improvement in communication competence is not limited to the perspective of the  
139 speaker who stutters. Byrd et al. [10] examined post-treatment communication competencies in  
140 11 adults who stutter who participating in communication-centered treatment. Each participant  
141 completed a mock interview with an unfamiliar interviewer during the first week (pre-treatment  
142 sample) and final week (post-treatment sample). Randomized video samples of these interviews  
143 were rated offline by an unfamiliar speech-language pathologist blind to pre-/post-treatment  
144 status of each video. As observed for children and adolescents who have participated in CCT,  
145 adults who stutter demonstrated observable post-treatment improvements in eight of the nine  
146 targeted communication competencies (i.e., language use, language organization, speech rate,  
147 intonation, volume, gestures, body position, eye contact, and facial affect), and, again, these  
148 improvements were not predicted by pre-treatment stuttering frequency. Taken together with

149 Coalson et al. [11], these preliminary data suggest that expert clinicians, as well as the adults  
150 who stutter themselves, observe positive changes in communication competencies when  
151 completing CCT, irrespective of pre- and/or post-treatment stuttering severity.

## 152 **Untrained observers**

153 Although the client- and clinician-based outcome measures used in Byrd et al. [9-11] are  
154 commonplace within clinical trials of adult stuttering treatment (e.g., [17, 31-34]; however, see  
155 [35-38] for third-party ratings of naturalness), it could be argued that the changes reported were  
156 evaluated from two parties – the client and the clinician – whose shared perspectives invite a  
157 potential for rater bias because of their personal history and knowledge of stuttering and/or  
158 stuttering treatment. A logical means to address potential rater biases due to familiarity with the  
159 condition, and/or its treatment, is to examine clinical outcomes from the perspective of raters  
160 who have neither – the naïve observer.

161 To date, no clinical trials known to the present authors have investigated post-treatment  
162 *communication competence* for adults who stutter from the perspective of the naïve observer.  
163 Unlike clinicians or participants, untrained observers provide a valuable means to assess the  
164 ecological validity of any communicative outcome measure, by virtue of their inherently variable  
165 standards of communication competence. Novice laypersons rely upon a range of intrinsic and  
166 extrinsic cues to evaluate the quality of a speaker's communication competence that are likely  
167 dissimilar from speakers and well-trained clinicians. By assessing the perspective of a large  
168 group of untrained observers, we can capture the variance of such internal criteria while also  
169 measuring the ecological impact of CCT outcomes. Thus, our primary research question is to  
170 assess to what extent the gains in communicative competence observed by clinicians in previous



171 studies are also evident to general public. That is, we will analyze whether treatment outcomes  
172 observed by the trained clinician withstand the inherent variability of observer judgement.

## 173 **Observer-based variables**

174 Naïve observers within the general public hold a well-documented negative bias towards  
175 persons who stutter (e.g., [39-42]). A number of demographic factors have been found to  
176 influence an observer's evaluation of any speaker (e.g., age, gender, education, occupation,  
177 familiarity with language/multilingualism), including those who stutter (see [13, 43-44]). Such  
178 demographic factors as well as additional observer-based factors have a potential or documented  
179 influence on naïve observers' attitudes towards adults who stutter (e.g., familiarity with person  
180 who stutters [45-46]; personal history with a communication disorder [47-48]; visible and/or  
181 nonvisible disability [49]).

182 Additionally, factors known to mitigate an observer's overall evaluation of an adult who  
183 stutters as a *person* may override any attempt to measure a targeted trait, such as communication  
184 abilities, of specific communicative traits, resulting overly positive evaluations (see Werle &  
185 Byrd [50] for positive feedback bias by professors when evaluating presentations students who  
186 stutter) or overly negative evaluations (see Byrd et al. [12], for gender bias towards adults who  
187 disclosure stuttering). Given the central nature of communication abilities to how a person who  
188 stutters is perceived to the general public, it is worthwhile to examine whether ratings of  
189 communication competence – the focus of the present study – are attributable to public biases.  
190 Said another way, it is possible that observer ratings of the communication competence of a  
191 particular adult who stutters may be driven entirely by their overall perception of all people who  
192 stutter irrespective of their communicative skills. Thus, a second critical question to consider is

193 to what extent observer-based factors mediate the opinions of the general public when rating  
194 communication abilities in adults who stutter to discern the unique influence of communication  
195 competence from generalized biases – positive or negative – towards adults who stutter.

## 196 **Rationale for the present study**

197 The purpose of the present study was to examine how naïve observers rate the  
198 communication skills of an adult who stutters who completed an approach to treatment that  
199 focuses on communication effectiveness and makes no attempt to modify fluency or reduce  
200 stuttered speech. A secondary aim of this study was to assess whether observer-based factors of  
201 untrained observers influence perceived communication competence.

202 **RQ1:** Does communication effectiveness training yield positive gains in naïve observers’  
203 evaluation of the communication skills of an adult who stutters?

204 **RQ2:** Do observer-based variables predict evaluation of the communication skills of an adult  
205 who stutters?

## 206 **Methods**

207 The following study was approved by the authors’ university institutional review board (IRB:  
208 2015-05-0044) and is part of an ongoing series of registered clinical trials (clinicaltrials.gov,  
209 NCT 05908123 [51]) designed to examine clinical outcomes of the Blank Center CARE  
210 Model™. Consent was obtained by all survey respondents prior to viewing communication  
211 competence stimuli. Communication competency stimuli was comprised of two separate videos:  
212 one depicting a speaker before he had completed CCT (Pre-treatment Video Stimuli) and one  
213 depicting the same speaker after he had received CCT (Post-treatment Video Stimuli).

## 214 **Communication-Centered Treatment (CCT)**

215           A detailed description of the treatment program is provided in Byrd et al. [10]. The over-  
216 arching goal is to ensure individuals who stutter communicate effectively, advocate for  
217 themselves in a manner that maintains agency, and ensure their quality of life does not depend on  
218 producing, or attempting to control, stuttered speech. In brief, adult participants complete 11  
219 weeks of treatment comprised of two 60-minute sessions per week (one group session, one  
220 individual session), totaling 22 sessions which include training in Communication, Advocacy,  
221 Resilience, and Education (the Blank Center CARE Model™). With respect to Communication,  
222 participants receive explicit instruction on how to appropriately incorporate nine core  
223 communication skills that do not rely on fluency speech production (i.e., language use, language  
224 function, speech rate, intonation, volume, gestures, body position, eye contact, facial affect).  
225 Training provided during the individual sessions provide a natural foundation for the weekly  
226 group sessions, wherein participants apply these skills in a variety of functional yet challenging  
227 speaking scenarios, including mock job interviews, small group mingling, impromptu  
228 icebreakers, one-on-one interactions with unfamiliar persons, and multiple presentations varied  
229 both in purpose (e.g., informative, persuasive, inspirational) and audience composition (e.g.,  
230 small and large groups, familiar and unfamiliar listeners).

## 231 **Communication competency stimuli**

232           Two video samples were selected from the 22 unscripted, impromptu mock interviews  
233 generated before and after treatment examined by Byrd et al. [10] – one recorded pre-treatment  
234 and its post-treatment counterpart. Each of the two video stimuli depicted a one-one-one, in-  
235 person mock interview between (a) an adult who stutters, who served as the interviewee, and (b)

236 an unfamiliar clinical staff member of the Blank Center, who served as the interviewer. The  
237 same adult who stutters served as interviewee in both Pre-treatment and Post-treatment Video  
238 Stimuli. Interviewers differed between video stimuli to limit potential habituation to speaker.  
239 Each interviewer was unfamiliar with the participant who served as the interviewee, and both  
240 were provided identical, commonplace interview questions as prompts (e.g., “What do you  
241 consider your strengths and weaknesses?”; “Describe a prior work-related issue and how you  
242 addressed it.”).

243         Selection criteria included (a) significant intra-speaker gains in communication  
244 competence as rated by the speech-language pathologist evaluator, and (b) relatively comparable  
245 stuttering frequency and severity. Although selecting a pre- and post-video sample of the same  
246 participant with identical stuttering frequency and severity was not possible, as unscripted  
247 interactions naturally vary in length, stuttering frequency, and stuttering severity, the video  
248 samples selected for the present study were matched as closely as possible. As detailed in Table  
249 1, stuttering severity equivalents for both the Pre- and Post-treatment Video Stimuli were rated  
250 as *moderate* per the Stuttering Severity Index – 4<sup>th</sup> Edition (SSI-4 [52]) Stuttering frequency and  
251 severity ratings for each video were completed by an unfamiliar speech-language pathologist  
252 trained in disfluency count scoring but unfamiliar with the participant and the timepoint (Pre-  
253 treatment, Post-treatment) of each video. To further examine perceptual differences between  
254 video samples, a validation survey (administered as part of a separate project, Byrd et al. [53])  
255 asked a separate cohort of naïve observers not included in this study to rate stuttering severity  
256 using a 100-point visual analog scale (0 = no stuttering, 100 = extremely severe stuttering) after  
257 rating one of the two video samples. Naïve observers rated stuttering severity to be statistically

258 comparable ( $p = .95$ ) between Pre- and Post-treatment Video Stimuli, with nearly identical mean  
259 severity ratings ( $M = 64.71$  and  $64.95$ , respectively; see Table 1).

260 **Table 1. Characteristics of Pre-Treatment and Post-Treatment Video Stimuli**

|                                         | Pre-treatment Video | Post-treatment Video |
|-----------------------------------------|---------------------|----------------------|
|                                         | Stimuli             | Stimuli              |
| %SS <sup>a</sup>                        | 10.60%              | 8.24%                |
| Total syllables                         | 594                 | 1258                 |
| Total words                             | 453                 | 959                  |
| SSI-4 <sup>b</sup>                      | Moderate            | Moderate             |
| Frequency                               | 7                   | 6                    |
| Duration                                | 10                  | 10                   |
| Physical Concomitants                   | 10                  | 9                    |
| Total                                   | 27                  | 25                   |
| Observer-Rated Severity (100-point VAS) |                     |                      |
| <i>M</i> (SE)                           | 64.71 (2.54)        | 64.95 (2.41)         |
| <i>N</i>                                | 63                  | 57                   |
| Length of Video                         | 5 min, 30 sec       | 6 min, 25 sec        |

261 <sup>a</sup>Percent of stuttered speech, disfluency types based on Yairi and Ambrose [54]

262 <sup>b</sup>Stuttering Severity Instrument-4<sup>th</sup> Edition [52]

263 The participant who served as the interviewee in the selected Pre- and Post-treatment  
264 videos was an adult Hispanic male who stutters. The participant spoke English and described  
265 himself as monolingual. No additional communication, developmental, psychological,

266 neurological, and/or physical issues were reported by the participant or identified by the clinician  
267 during initial evaluation.

## 268 **Survey administration and respondent description**

269 The two selected video samples were embedded in a Qualtrics-based survey distributed to  
270 adult, untrained observers via MTurk platform who were compensated for their participation,  
271 with the survey prompting one of the two videos in succession of access of the survey to ensure  
272 random observation of the Pre- and the Post-treatment sample. Each survey began with an  
273 informed consent landing page, followed by the instructions: “You are about to watch a video of  
274 an interview. Immediately following the video, you will be asked questions about the  
275 interviewee. The interview will be approximately 5 to 7 minutes in length. You will only be  
276 able to move forward in the survey after you have watched the video in its entirety.” Participants  
277 then watched either the video of the participant before training (Pre-treatment Video Stimuli), or  
278 the participant after training (Post-treatment Video Stimuli), with the “advance” button disabled  
279 for both the survey portal and the embedded video. Following the video, respondents were  
280 provided the following instructions accompanied by a 0-100 visual analog rating scale: “Using  
281 the scale below, please rate the interviewee’s communication skills. 0 = Communication skills  
282 not at all effective, 50 = Communication skills somewhat effective, 100 = Communication skills  
283 extremely effective.” Participants were then asked to describe what factors led to their rating in  
284 a free response text box. Following their rating and written feedback, respondents were asked to  
285 provide demographic information (e.g., age, race, ethnicity, gender, education, occupation,  
286 primary language). Participants were also asked to report their personal relationship with  
287 stuttering, persons who stutter, or other communication disorders (“Are you a person who  
288 stutters? Do you personally know a person who stutters? If so, please describe your relationship

289 and how long you have known this person. Have you had previous speech, language, and/or  
290 hearing evaluation or therapy?") as well as any visible or nonvisible diagnoses unrelated to  
291 communication difficulties (i.e., physical condition, psychological condition, neurological  
292 condition, emotional condition, vision/hearing loss, reading disorder, other/describe, none).  
293 Each survey included three attention check questions and four comprehension check questions to  
294 assess quality of individual responses. Survey data was collected in July 2021, and all  
295 respondents who completed the survey following the Pre-treatment and Post-treatment Video  
296 Stimuli in full were paid per MTurk standards of distribution.

297         The survey was initiated by 128 respondents (67 Pre-treatment Video Stimuli, 61 Post-  
298 treatment Video Stimuli). Of these 128 respondents, 36 (28%, 19 Pre-treatment Video Stimuli,  
299 17 Post-treatment Video Stimuli) did not pass at least one of the seven attention/comprehension  
300 check questions during the course of the survey and were excluded from final analysis. Of the  
301 remaining 92, four were excluded because they self-identified as a person who stutters (2 Pre-  
302 treatment Video Stimuli, 2 Post-treatment Video Stimuli). Seven additional respondents were  
303 excluded (3 Pre-treatment Video Stimuli, 4 Post-treatment Video Stimuli) due to free-response  
304 items that suggested unclear understanding of the task (e.g., "*She [the interviewer] can ask some*  
305 *more questions.*"), questionable attention to the study (e.g., "*Everything is perfect.*"), or  
306 potentially auto-generated responses (e.g., unusual format of free-responses repeated across  
307 items or participants). The final corpus included 81 respondents (43 Pre-treatment Video Stimuli,  
308 38 Post-treatment Video Stimuli). See Table 2 for detailed description of respondents.

309 **Table 2. Demographic characteristics of naïve observer groups**

---

Video Stimuli Groups

---

|                        | Pre-treatment | Post-treatment | <i>N</i>    | <i>t, X<sup>2</sup></i> | <i>p</i> |
|------------------------|---------------|----------------|-------------|-------------------------|----------|
| <i>N</i>               | 43            | 38             | 81          |                         |          |
| Age                    | 43.4 (16.4)   | 41.8 (16.5)    | 42.4 (16.5) | .39                     | .35      |
| Race                   |               |                |             | 1.75                    | .19      |
| Native American or     |               |                |             |                         |          |
| Alaskan Native         | 0             | 0              | 0           |                         |          |
| Asian                  | 8             | 5              | 13          |                         |          |
| Black or African       |               |                |             |                         |          |
| American               | 6             | 3              | 9           |                         |          |
| Native Hawaiian or     |               |                |             |                         |          |
| Pacific Islander       | 0             | 0              | 0           |                         |          |
| White                  | 27            | 29             | 56          |                         |          |
| Other Identification   | 2             | 1              | 3           |                         |          |
| Ethnicity              |               |                |             | .74                     | .39      |
| Not Hispanic or Latino | 38            | 31             | 69          |                         |          |
| Hispanic or Latino     | 5             | 7              | 12          |                         |          |
| Self-Identified Gender |               |                |             | 2.9                     | .09      |
| Male                   | 19            | 24             | 43          |                         |          |
| Female                 | 24            | 14             | 38          |                         |          |
| Other Identification   | 0             | 0              | 0           |                         |          |
| Years of Education     | 16.4 (2.7)    | 16.5 (3.0)     | 16.5 (2.8)  | -.13                    | .45      |
| Primary Language       |               |                |             | .07                     | .80      |
| Bengali                | 0             | 1              | 1           |                         |          |



|                                |             |            |             |     |     |
|--------------------------------|-------------|------------|-------------|-----|-----|
| English                        | 36          | 31         | 67          |     |     |
| Filipino                       | 1           | 0          | 1           |     |     |
| French                         | 0           | 1          | 1           |     |     |
| Hindi                          | 0           | 1          | 1           |     |     |
| Marathi                        | 1           | 0          | 1           |     |     |
| Portuguese                     | 2           | 1          | 3           |     |     |
| Saurashtra                     | 1           | 0          | 1           |     |     |
| Swedish                        | 0           | 1          | 1           |     |     |
| Tamil                          | 2           | 1          | 3           |     |     |
| Turkish                        | 0           | 1          | 1           |     |     |
| Knows adult who stutters       | 25          | 19         | 44          | .54 | .46 |
| Years known                    | 12.6 (17.0) | 9.7 (14.2) | 11.2 (15.8) | .83 | .21 |
| Nonvisible or mixed disability | 8           | 8          | 16          | .08 | .78 |

---

*Note.* Means and standard deviations (in parenthesis) reported for age, years of education, and years known.

## 310 **Analyses**

311 **RQ1:** An independent *t*-test was conducted to compare naïve observers' evaluation of  
312 communication competency depicted in one of two stimuli - a video depicting an adult who  
313 stutters who received communication effectiveness training (Post-treatment Video Stimuli) or a  
314 video depicting an adult who stutters who has not received communication effectiveness training  
315 (Pre-treatment Video Stimuli). Video type (Post-treatment Video Stimuli, Pre-treatment Video  
316 Stimuli) served as the independent variable, and ratings from the 100-point visual analog scale  
317 (VAS) of communication skills served as the dependent variable (0 = low competence, 100 =

318 high competence). Effect sizes were obtained using Cohen's  $d$  [55]. Because of the preliminary  
319 nature of the data and modest sample size, findings were verified by non-parametric analysis  
320 (Mann-Whitney  $U$ ,  $\alpha = .05$ ).

321 **RQ2:** A linear regression was conducted to assess the influence of viewing  
322 communication competency stimuli (Post-treatment Video Stimuli, Pre-treatment Video Stimuli)  
323 and nine observer-related variables (age, race, ethnicity, gender, years of education, non-English  
324 primary language, knowing an adult who stutters, number of years respondent has known adult  
325 who stutters, nonvisible diagnosis; see Table 2) upon ratings of the communication skills of an  
326 adult who stutters. Categorical variables with responses that were either not reported (i.e., non-  
327 binary self-identified gender) or reported infrequently (i.e., non-English primary language with  
328 fewer than 4 respondents) were transformed to create a single binary variable (i.e., male/female;  
329 English/non-English primary language). To maintain relatively even distribution amongst  
330 categories during analysis, race was collapsed into a single binary variable (i.e., White, people of  
331 color) due to relatively infrequent self-identification as Black/African American ( $n = 9$ ; Pre-  
332 treatment Video Stimuli = 6, Post-treatment Video Stimuli = 3) or racial identification that was  
333 not included in existing categories ( $n = 3$ , Pre-treatment Video Stimuli = 2, Post-treatment Video  
334 Stimuli = 1).

335 To determine which of the nine observer-related factors held meaningful predictive value  
336 of observer ratings, and therefore qualify for entry into the linear regression, we applied a  
337 version of Hosmer et al.'s [56] step-by-step method for *purposeful selection of covariates*  
338 modified for OLS linear regression. First, nine univariate analyses were conducted for each  
339 variable (chi-square tests for categorical variables, independent t-tests for continuous variables).  
340 Only variables with  $p$ -values greater than 0.25 were excluded. Second, a model with non-

341 excluded variables was fitted, then each predictor re-assessed and deleted if significance  
342 exceeded  $p > .05$ . Third, the reduced model was compared to the original model using  $F$  values  
343 to ensure improved fit and to verify that change in beta coefficients between models did not  
344 exceed 20% (i.e., deleting-refitting-verifying cycle). Fourth, any variables that were excluded  
345 during the initial step were re-entered into the model, one at a time, but retained only if  $p$ -values  
346 were less than .05. Fifth, any interaction terms of interest between the remaining variables were  
347 entered into the model. Interaction terms were assessed using the deleting-refitting-verifying  
348 cycle used for main effects and retained only if statistically significant at  $p < .05$  and if model  
349 fitness improved. Any main effects and interaction terms remaining after these steps were  
350 completed comprised the final model (see Table 3). Because of the preliminary nature of the data  
351 and modest sample size, bootstrap analysis was conducted to confirm initial findings (95%  
352 confidence intervals; 5000 samples).

353

354

355

**Table 3. Summary of regression analyses of stimuli (Pre-treatment Video Stimuli, Post-treatment Video Stimuli) and observer-based factors predicting communication skills of an adult who stutters, as rated by naïve observers**

|              | Variable                                 | <i>B</i>     | 95% CI             | $\beta$    | <i>t</i>    | <i>p</i>    | <i>F</i> | <i>df</i> | <i>R</i> <sup>2</sup> |
|--------------|------------------------------------------|--------------|--------------------|------------|-------------|-------------|----------|-----------|-----------------------|
| Model 1      | Intercept                                | -5.25        | -11.34, .78        |            | -1.68       | .089        | 6.03     | 1, 79     | .071                  |
|              | <b>Pre-/Post-treatment Video Stimuli</b> | <b>11.24</b> | <b>2.38, 20.11</b> | <b>.27</b> | <b>2.46</b> | <b>.013</b> |          |           |                       |
| Model 2      | Intercept                                | -5.68        | -11.25, -.11       |            | -1.95       | .046        | 7.30     | 3, 77     | .221                  |
|              | <b>Pre-/Post-treatment Video Stimuli</b> | <b>12.12</b> | <b>3.97, 20.26</b> | <b>.29</b> | <b>2.84</b> | <b>.004</b> |          |           |                       |
|              | Years of education                       | -2.47        | -3.92, -1.03       | -.33       | -3.28       | <.001       |          |           |                       |
|              | Years AWS known                          | .23          | -.03, .49          | .17        | 1.67        | .087        |          |           |                       |
| Bootstrapped | Intercept                                |              | -11.59, .07        |            |             | .063        |          |           |                       |
|              | <b>Pre-/Post-treatment Video Stimuli</b> |              | <b>3.88, 20.72</b> |            |             | <b>.007</b> |          |           |                       |
|              | Years of education                       |              | -3.99, -.85        |            |             | .003        |          |           |                       |
|              | Years AWS known                          |              | .01, .46           |            |             | .049        |          |           |                       |

*Note.* CI = confidence interval for unstandardized beta coefficients; AWS = adult who stutters

## 354 **Results**

355 **RQ1:** An independent *t*-test was conducted to assess how naïve observers rate  
356 communication skills of an adult who stutters. As depicted in Fig 1, findings reveal significantly  
357 stronger perceived communication skills when viewing the video of a speaker post-CCT (Post-  
358 treatment Video Stimuli;  $M = 70.3$ ,  $SD = 21.1$ ) than when viewing a video of a speaker pre-CCT  
359 (Pre-treatment Video Stimuli;  $M = 59.0$ ,  $SD = 20.1$ ),  $t(79) = 2.46$ ,  $p = .016$ ,  $d = .55$  [medium  
360 effect size]. Findings were confirmed via nonparametric analysis,  $U(43,38) = 532.50$ ,  $z = 2.70$ ,  
361  $p = .007$ .

362 **RQ2:** A linear regression was conducted to determine the contribution of observer-  
363 related factors (i.e., age, race, ethnicity, gender, years of education, non-English primary  
364 language, knowing an adult who stutters, number of years respondent has known adult who  
365 stutters, nonvisible diagnosis) upon ratings of the communication skills of an adult who stutters.  
366 As expected, the video stimuli depicting a speaker post-treatment was a significant predictor of  
367 higher observer ratings when entered as the lone predictor variable ( $\beta = .67$ ,  $p = .013$ ), explaining  
368 7.1% of the variance ( $R^2 = .071$ ;  $F(1, 79) = 6.03$ ,  $p = .016$ ; see Model 1 in Table 2). Upon  
369 completing Hosmer et al.'s (2013) purposeful selection of covariates, only two factors were  
370 identified as potential predictive covariates: (1) years of education, which significantly predicted  
371 observer ratings ( $\beta = -.33$ ,  $p < .001$ ) and accounted for 12.2% of the variance ( $R^2 = .122$ ), and (2)  
372 years the respondent has known an adult who stutters, which approached significance ( $\beta = .17$ ,  $p$   
373  $= .087$ ), and accounted for 2.8% of the variance ( $R^2 = .028$ ). After accounting for the  
374 contribution of these two observer-based factors, video stimuli of a post-treatment speaker  
375 remained a significant, positive predictor of improved observer ratings ( $\beta = .29$ ,  $p = .004$ ) with

376 the final model accounting for 22.1% of the variance ( $R^2 = .221$ ;  $F(3, 77) = 7.30$ ,  $p < .001$ ; see  
377 Model 2 in Table 3).

378 To verify these outcomes, a bootstrapping analysis was conducted to determine 95%  
379 confidence interval (CI) for unstandardized beta coefficients of each factor based on 5000  
380 samples. Bootstrap analysis confirmed a significant, positive coefficient for video stimuli  
381 depicting a post-treatment speaker ( $p = .007$ , [CI: 3.88, 20.72]) while controlling for potential  
382 influence of both observer-related factors (years of education:  $p = .003$ , [CI: -3.99, -.85]; years  
383 respondents have known an adult who stutters:  $p = .049$  [CI: .01, .46]).

## 384 Discussion

385 The primary purpose of this study was to examine whether naïve observers rated an adult  
386 who stutters as a stronger communicator after completing a specialized 11-week treatment  
387 program (CCT) designed to enhance communication skills rather than stuttering frequency or  
388 severity. A secondary purpose was to examine to what extent observer-related factors mediated  
389 these ratings. A large sample of naïve observers were recruited to view, and then rate, one of  
390 two videos of an adult who stutters who had completed the treatment program (Post-treatment  
391 Video Stimuli) or who had yet to complete the treatment program (Pre-treatment Video Stimuli).  
392 Findings indicate that naïve observers rated the speaker in the Post-treatment Video Stimuli to be  
393 a stronger communicator than the same speaker in the Pre-treatment Video Stimuli video. Two  
394 observer-rated factors were identified as significantly associated with communication  
395 competency ratings: (1) years of rater education and (2) years the rater had personally known an  
396 adult who stutters. Accounting for these factors, naïve observers nevertheless rated the video of  
397 the adult who stutters recorded after training as a significantly stronger communicator.

398 **RQ1: Communication competence gains from the perspective of**  
399 **naïve observers**

400 Naïve observers rated the communication competence of an adult who stutters  
401 demonstrates during a mock interview recorded after CCT (Post-treatment Video Stimuli) as  
402 significantly higher than the video of the same adult, in the same mock interview setting,  
403 recorded prior to CCT (Pre-treatment Video Stimuli). These findings are consistent with the  
404 significant pre-/post-treatment gains in communication competence reported for adults who  
405 stutter as rated by speech-language pathologists [10] and client's self-reported dyadic  
406 interactions ([11]; dyadic interactions:  $p < .0001$ ). Findings also corroborate significant gains in  
407 communication competence observed by speech-language pathologists for young children and  
408 adolescents after a one-week treatment program based on the same clinical principles [9].  
409 Consistency across ratings of communication competence from three difference perspectives –  
410 client, clinician, and naïve observer – provide confidence that changes in previous studies were  
411 not attributable to rater bias (i.e., client or clinician) and perhaps reflect a meaningful change in  
412 communication abilities also observable by untrained laypersons.

413 Unlike previous studies by Byrd and colleagues [9-10], wherein a single clinician rated  
414 pre-/post-treatment video samples from multiple adults who stutter (i.e., many-to-one), the  
415 structure of observation in this study was reversed. In those previous studies, our analyses  
416 captured the variance of treatment outcomes across multiple participants, with rater variance held  
417 constant by use of a single clinician rater. In the present study, multiple observers rated  
418 communication competence of a single adult who stutters (i.e., one-to-many) based on viewing  
419 one of two videos. By assigning one video to one respondent per survey, we were able to

420 minimize respondent burden of watching multiple videos and potential order effects. Moreover,  
421 this statistical design allowed us to capture the variance of responses amongst the general public  
422 in response to changes in communication competence previously observed by clinicians. These  
423 data provide preliminary proof that gains observed in the clinic may also generalize to the  
424 perceptions of unfamiliar observers beyond the clinic – an issue of critical concern for any  
425 clinical trial and many participants in treatment. That being said, it is possible that the  
426 consistency between within-clinic and beyond-clinic evaluation of communication competence  
427 observed in this study may vary between individual participants. A natural next step is to assess  
428 the variance of treatment outcomes across participants by a single naïve observer, similar to one-  
429 to-many rating design in Byrd et al. [9-10], practical issues notwithstanding (e.g., order effects,  
430 participant/respondent burden). For now, findings from the present study provide meaningful  
431 external validity for the positive outcomes a novel treatment approach, and suggest that gains in  
432 communication competence, when observed in the clinic by a single clinician, will likely be  
433 observed by the general public.

434 As noted, stuttering frequency and severity in the Pre-Treatment and Post-treatment  
435 Video Stimuli were comparable (Pre-treatment Video Stimuli: SSI-4: 31 moderate [score 27];  
436 Post-treatment Video Stimuli: SSI-4: moderate [score 25]), lending support to the notion that  
437 ratings of communication competence were not driven by changes on overt or observable  
438 stuttering behaviors. One may suggest that, similar to the rationale of the present study for  
439 communication competence, ratings of stuttering severity provided by expert clinicians may not  
440 reflect judgments of severity by the naïve listeners in the general public, and potentially  
441 influenced the observed-based ratings of communication competence more than expected.  
442 Comparable observer-based ratings of stuttering severity for Pre-Treatment and Post-treatment



443 Videos reported in Table 1 ( $p = .95$ ) suggest this was not the case. It is also possible that  
444 observer judgment of stuttering severity was less distracting because it was accompanied by  
445 higher (or lower) communication abilities. For example, Werle et al. [57] found that naïve  
446 observers who view a presenter who producing 15% SLDs but demonstrates high  
447 communication competence rate the stuttering as less distracting than the same presenter  
448 produced 15% SLDs but demonstrated low communication competence.

449 Further assessment of qualitative feedback from respondents in the present study support  
450 the findings of Werle et al. [57] and indicate that fluency was less of a concern in the presence of  
451 stronger communication competence in the Post-treatment Video Stimuli. When comparing the  
452 most neutral observers (i.e., 50% who provided the neither the most or least favorable ratings in  
453 each group; 25<sup>th</sup> to 75<sup>th</sup> percentile), respondents who watched the Post-treatment Video Stimuli  
454 noted that they certainly heard the interviewee stuttering, but also commented that its importance  
455 was offset by communication skills (e.g., *“The interviewee was very articulate and concise in his  
456 language and tone of voice. He used his hands when speaking, which made him appear more  
457 animated and that was easier to follow.”* *“Even though the interviewee had a stuttering issue, he  
458 was able to explain himself well. He gave good examples when asked for them by the  
459 interviewer.”*; *“I believe that [he] communicated well. ... He looked the interviewer directly in  
460 the eyes, smiled, and nodded.”*). Accordingly, respondents who viewed the Pre-treatment Video  
461 Stimuli (25<sup>th</sup> to 75<sup>th</sup> percentile) often focused either on stuttering alone (e.g., *“He was not bold  
462 and confident about the way he deliver[s] things. He is a stammer[er]”*; *“The interviewee has a  
463 speech impediment and it is difficult for him to communicate verbally.”*) or stuttering in addition  
464 to poor nonverbal communication skills (e.g., *“He seems to stay within his capabilities of  
465 communication, but his stutter is distracting. He answers questions directly, but he doesn't use*

466 *much eye contact.*”; “*He had a stutter and his body language looked tense but he gave great*  
467 *answers.*”) In sum, although similarly moderate stuttering was present in both videos and  
468 perceived by both respondent cohorts, qualitative data from the present study indicate that,  
469 consistent with Werle et al. [57], heightened communication skills of the speaker who received  
470 training helped to minimize the relevance of stuttering severity during observers judgment.

## 471 **RQ2: Observer-based factors associated with ratings of** 472 **communication competence**

473 Two demographic factors – years of education and years the respondent had known an  
474 adult who stutters - were identified as significant predictors of observer-rated communication  
475 competence. Specifically, observers rated communication competence to be stronger as the  
476 number of years the respondent had personally known an adult who stutters increased, but  
477 weaker as the amount of education the respondent had completed increased. Although observer-  
478 rated evaluations of communication competence remained significant upon controlling for these  
479 factors during analyses, the potential implications of these two factors warrant discussion. In  
480 terms of the number of years respondents have known a person who stutters, previous research  
481 has indicated that people who have developed first-hand relationships with any stigmatized  
482 groups are likely to report improved overall judgments of persons within that group (e.g., [58-  
483 59]), including persons who stutter (e.g., [60-61]; cf. [46, 62]). It is noteworthy that simply  
484 knowing/not knowing a person who stutters was insufficient to impact ratings, suggesting that  
485 the quantity and perhaps quality of time spent with an individual who stutters is necessary to  
486 significantly change how one views the communication abilities of a person who stutters. Future  
487 studies examining observer evaluations of participants who stutter should continue to include this

488 as a measured factor, based on its long-standing influence on the general public views  
489 individuals who stutter.

490         Across videos, there was a significant negative relationship between years of education  
491 and communication ratings, wherein participants with higher levels of education often provided  
492 lower ratings of the speaker's communication abilities, regardless of the video presented. To be  
493 clear, the mean number of years of education for each respondent group was equivalent (Pre-  
494 treatment Video Stimuli;  $M = 16.4$  years of education; Post-treatment Video Stimuli,  $M = 16.5$   
495 years of education,  $p = .45$ ). Research investigating responses to historically stigmatized groups  
496 has documented several patterns of responses held by evaluators. The pattern of response in the  
497 present study is consistent with the status characteristic model (e.g., [63]). Within this model,  
498 evaluators hold lower expectations of a particular group, and group members must perform  
499 exceptionally compared to in-group peers to achieve equivalent ratings. This pattern of response  
500 is in contrast to the positive feedback bias found in the shifting standards model in which lower  
501 expectations of the stigmatized group result in unduly earned higher ratings [64]. Relevant to the  
502 present study, researchers have found that when evaluators are judging individuals for maximum  
503 competency or skills, they align more with the status characteristic model [65]. In other words,  
504 when tasked with examining for top performance, evaluators rate members of stigmatized groups  
505 more critically and assign lower ratings. One interpretation of the present results is related to the  
506 video context and protocol directions. Job interviews are arguably high-stakes experiences in  
507 which candidates are evaluated critically. It is possible that, when tasked with evaluating  
508 communication skills within this high-stakes context, individuals with more years of education  
509 were evaluating more sensitively and/or with higher expectations than individuals with fewer

510 years of education. This could possibly be anchored in their own personal experiences as either  
511 an interviewee or interviewer.

512 Results are contrary to recent works by Werle and Byrd [50, 66], however, who detailed a  
513 potential positive response bias when raters with higher years of education (i.e., college  
514 professors) evaluate students who stutter. It is possible that positive response bias becomes less  
515 evident for respondents who experience fewer years of academic evaluation based on  
516 communication abilities, or perhaps a unique pattern observed for professors and teachers whose  
517 job duties require ongoing evaluation of adult students. It is also possible that dyadic speaking  
518 context lowered the likelihood of positive feedback bias found for professors, who were perhaps  
519 more likely to overcorrect their personal biases observed for Werle and Byrd [50, 66] when  
520 presented with a speaker in a context for which they regularly provide evaluation (e.g.,  
521 presentations). In that respect, positive response bias for the mock interviews included in the  
522 present study may be more apparent for respondents with a history of employment or training in  
523 human resources. Combined, although these two factors held significantly influence on ratings  
524 of communication competence, the significance of video status (Pre-treatment versus Post-  
525 treatment) beyond the influence of these factors, as well as the large number of demographic  
526 information included in the analyses, provides greater confidence that CCT training may be  
527 effective irrespective of unique demographic factor.

## 528 **Limitations and future studies**

529 Although these combined factors accounted for an estimated 22.1% of the variance in the  
530 sample population of untrained observers – a non-trivial amount of inter-subject variability when  
531 evaluating communication competence of an adult who stutters - we acknowledge that a number

532 of additional factors, known and unknown, beyond the focus of CCT also influence observer  
533 judgments. For example, visual nonverbal information (e.g., attire, physical appearance,  
534 environments) have a documented effect on evaluator judgments (e.g., [67]). To this point, it  
535 should be noted that the same adult was depicted in both video samples in the present study and,  
536 by coincidence, the participant happened to be wearing a necktie on during the first interview  
537 (Pre-treatment Video Stimuli). Although this may be considered more professional attire, this  
538 video was also rated less favorably, suggesting that attire was less critical than overall  
539 communication skills. Another unfortunate potential speaker-based factor that may influence  
540 ratings, but unrelated to CCT, was degree of accent and language proficiency. To be clear, the  
541 interviewee in this study was monolingual with no observable accent, nor did respondents note  
542 the speaker's accent or English proficiency during subjective feedback. During pilot studies,  
543 however, naïve observers rated a multilingual adult who stutters with strong English proficiency  
544 but a heavier accent less favorably during a similar interview sample. These same respondents  
545 often provided specific negative feedback focusing on the speaker's accent and/or level of  
546 English proficiency. Future studies of this nature should provide a clear definition of as well as  
547 linguistic versus speech fluency from the outset, similar to the instructions provided to  
548 respondents in Werle and Byrd [50, 66] fluency versus communication skills.

549 From a methodological standpoint, video samples that naturally vary in length and content  
550 also introduce potential confounds. For example, in the present study, the Post-treatment Video  
551 was longer and contained more total words than the Pre-treatment Video Sample, introducing the  
552 possibility that respondents became fatigued or impatient when viewing and prior to VAS rating.  
553 Again, the Post-treatment Video Sample received a significantly stronger mean rating than the  
554 Pre-treatment Video Sample, which tempers this concern. It is also possible that, although both

555 mock interviews were unprompted events, and interviewers were unknown to the participants,  
556 the participant benefitted from the previous mock interview experience and felt at greater ease in  
557 the identical space provided for both interviews. Additional review of communication skills in a  
558 different space, or perhaps investigation of content overlap between interviews, would address  
559 this point. Yet another consideration is that dyadic interviews lend themselves to a specific, one-  
560 on-one style of interaction that favors certain adults who stutter more than others, and post-CCT  
561 gains may not necessarily generalize to other contexts such as presentations (however, see  
562 Coalson et al. [11] for post-CCT gains across all speaking contexts as rated by adult clients who  
563 stutter). It is important to note this is one entry in a series of clinical trials focused on the  
564 outcomes of CCT from a variety of perspectives (e.g., self, clinician, observer). A larger cohort  
565 of respondents is always necessary to corroborate preliminary results, and examination of  
566 clinical outcomes will continue across multiple contexts, from multiple perspectives, and with  
567 multiple measures, in future studies.

## 568 **Conclusion**

569 This study examined the clinical outcomes of CCT – a specialized treatment for adults  
570 who stutter that focuses on communication rather than fluency – from the perspective of naïve  
571 observers. Results found that naïve observers rated a participant depicted in a video sample  
572 recorded after treatment as a significantly stronger communicator than a video of the same  
573 participant recorded prior to treatment. Findings provide corroborating evidence that clinical  
574 gains in communication competence rated by clinicians, and self-rated by participants, in  
575 previous studies was also observed for unfamiliar, untrained observers.

## 576 **Acknowledgements**

577           This project was supported by the foundational grant support funded to the Arthur M.  
578 Blank Center for Stuttering Education and Research and endowed support provided through the  
579 Michael and Tami Lang Stuttering Institute, the Dr. Jennifer and Emanuel Bodner  
580 Developmental Stuttering Laboratory, and the Dealey Family Foundation Stuttering Clinic  
581 awarded to the second author. The authors would like to thank Michael Mahometa for his  
582 assistance with statistical analysis and all survey participants.

## 583 **References**

- 584 1. Morreale SP, Osborn MM, Pearson JC. Why communication is important: A rationale for  
585 the centrality of the study of communication. *J Assoc for Commun Adm.* 2000;29(1):1.
- 586 2. AC Nielsen Research Services. Research on employer satisfaction with graduate skills.  
587 Interim Report Canberra, Australia. 1998
- 588 3. Mikkelson AC, York JA, Arritola J. Communication competence, leadership behaviors, and  
589 employee outcomes in supervisor-employee relationships. *Bus Prof Commun Q.* 2015  
590 Sep;78(3):336-54.
- 591 4. Payne HJ. Reconceptualizing social skills in organizations: Exploring the relationship  
592 between communication competence, job performance, and supervisory roles. *J Leadersh  
593 Organ Stud.* 2005 Jan;11(2):63-77.
- 594 5. Scudder JN, Guinan PJ. Communication competencies as discriminators of superiors' ratings  
595 of employee performance. *J of Bus Commun (1973).* 1989 Jun;26(3):217-29.
- 596 6. Beebe SA, Beebe SJ, Redmond M, Geerinck T, Salem-Wiseman L. Interpersonal  
597 communication: Relating to others. 6th Can. Ed. Toronto: Pearson Canada; c2015.
- 598 7. Spitzberg BH, Cupach WR. Interpersonal skills. In: Knapp ML & Daly JA, editors. *The  
599 Sage handbook of interpersonal communication.* 4th ed. Los Angeles (CA); SAGE; 2011.  
600 p. 481-524.

- 601 8. Brignell A, Krahe M, Downes M, Kefalianos E, Reilly S, Morgan AT. A systematic review  
602 of interventions for adults who stutter. *J Fluency Disord.* 2020 Jun;64:105766. doi:  
603 10.1016/j.jfludis.2020.105766. Epub 2020 Apr 30. PMID: 32438123.
- 604 9. Byrd CT, Winters KL, Young M, Werle D, Croft RL, Hampton E, Coalson G, White A,  
605 Gkalitsiou Z. The Communication benefits of participation in Camp Dream. *Speak. Live.:*  
606 *An extension and replication. Semin Speech Lang.* 2021 Mar;42(2):117-135. doi: 10.1055/s-  
607 0041-1723843. Epub 2021 Mar 16. PMID: 33725730.
- 608 10. Byrd CT, Coalson GA, Young MM. Targeting communication effectiveness in adults who  
609 stutter: A preliminary study. *Top Lang Disord.* 2022 Jan 1;42(1):76-93.
- 610 11. Coalson, GA, Byrd, CT, Werle D. Self-reported communication competence by adults who  
611 stutter following communication competence treatment (CCT). Poster session presented at:  
612 National Black Association for Speech, Language, and Hearing Conference 2023. Apr 20-  
613 22. Washington, DC.
- 614 12. Byrd CT, McGill M, Gkalitsiou Z, Cappellini C. The effects of self-disclosure on male and  
615 female perceptions of individuals who stutter. *Am J Speech Lang Pathol.* 2017 Feb  
616 1;26(1):69-80. doi: 10.1044/2016\_AJSLP-15-0164. PMID: 28056467.
- 617 13. Louis KO. Epidemiology of public attitudes toward stuttering. In *Stuttering meets*  
618 *stereotype, stigma, and discrimination: An overview of attitude research 2015* (pp. 7-42).  
619 West Virginia University Press Morgantown, WV.
- 620 14. O'Brian S, Carey B, Onslow M, Packman A, Cream A. *The Camperdown program for*  
621 *stuttering: treatment manual.* Sydney: Australian Stuttering Research Center. 2010 Jan.
- 622 15. Kroll R. The Fluency Plus Program: an integration of fluency shaping and cognitive  
623 restructuring procedures for adolescents and adults who stutter. In: Guitar B & McCauley R,  
624 editors. *Treatment of stuttering: Established and emerging interventions.* Philadelphia(PA):  
625 Lippincott Williams & Wilkins; 2010. p. 277-311.
- 626 16. Van Riper C. *The treatment of stuttering.* Englewood Cliffs(NJ): Prentice Hall; 1973.
- 627 17. Menzies RG, O'Brian S, Onslow M, Packman A, St Clare T, Block S. An experimental  
628 clinical trial of a cognitive-behavior therapy package for chronic stuttering. *J Speech Lang*  
629 *Hear Res.* 2008 Dec;51(6):1451-64. doi: 10.1044/1092-4388(2008/07-0070). Epub 2008 Jul  
630 29. PMID: 18664696.



- 631 18. Menzies R, O'Brian S, Packman A, Jones M, Helgadóttir FD, Onslow M. Supplementing  
632 stuttering treatment with online cognitive behavior therapy: An experimental trial. *J*  
633 *Commun Disord.* 2019 Jul-Aug;80:81-91. doi: 10.1016/j.jcomdis.2019.04.003. Epub 2019  
634 May 2. PMID: 31100535.
- 635 19. Craig AR, Hancock K. Self-reported factors related to relapse following treatment for  
636 stuttering. *Aust J Hum Commun Disord.* 1995 Jun 1;23(1):48-60.
- 637 20. Cream A, Onslow M, Packman A, Llewellyn G. Protection from harm: the experience of  
638 adults after therapy with prolonged-speech. *Int J Lang Commun Disord.* 2003 Jan  
639 1;38(4):379-95.
- 640 21. De Nardo T, Tetnowski JA, Coalson GA. Listener perceptions of stuttering and stuttering  
641 modification techniques. *J Fluency Disord.* 2023 Mar;75:105960. doi:  
642 10.1016/j.jfludis.2023.105960. Epub 2023 Jan 27. PMID: 36736074.
- 643 22. Manning WH, Burlison AE, Thaxton D. Listener response to stuttering modification  
644 techniques. *J Fluency Disord.* 1999 Dec 1;24(4):267-80.
- 645 23. Von Tiling J. Listener perceptions of stuttering, prolonged speech, and verbal avoidance  
646 behaviors. *J Commun Disord.* 2011 Mar-Apr;44(2):161-72. doi:  
647 10.1016/j.jcomdis.2010.09.002. Epub 2010 Sep 16. PMID: 20947094.
- 648 24. Winters KL, Byrd CT. Predictors of communication attitude in preschool-age children who  
649 stutter. *J Commun Disord.* 2021 May-Jun;91:106100. doi: 10.1016/j.jcomdis.2021.106100.  
650 Epub 2021 Apr 14. PMID: 33862497.
- 651 25. Werle D, Winters KL, Byrd CT. Preliminary study of self-perceived communication  
652 competence amongst adults who do and do not stutter. *J Fluency Disord.* 2021  
653 Dec;70:105848. doi: 10.1016/j.jfludis.2021.105848. Epub 2021 Apr 8. PMID: 33895686.
- 654 26. Byrd C, Chmela K, Coleman C, Weidner M, Kelly E, Reichhardt R, Irani F. An introduction  
655 to camps for children who stutter: What they are and how they can help. *Perspect ASHA*  
656 *Spec Interest Groups.* 2016 Mar 31;1(4):55-69.
- 657 27. Byrd CT, Gkalitsiou Z, Werle D, Coalson GA. Exploring the effectiveness of an intensive  
658 treatment program for school-age children who stutter Camp Dream. *Speak. Live.: A*  
659 *follow-up study. Semin Speech Lang.* 2018 Nov;39(5):458-468. doi: 10.1055/s-0038-  
660 1670669. Epub 2018 Sep 19. PMID: 30231266.

- 661 28. Yaruss JS, Quesal RW. Overall assessment of the speaker's experience with stuttering.  
662 Stuttering Therapy Resources, Inc; 2016
- 663 29. Dewalt DA, Thissen D, Stucky BD, Langer MM, Morgan Dewitt E, Irwin DE, Lai JS,  
664 Yeatts KB, Gross HE, Taylor O, Varni JW. PROMIS Pediatric Peer Relationships Scale:  
665 Development of a peer relationships item bank as part of social health measurement. *Health*  
666 *Psychol.* 2013 Oct;32(10):1093-103. doi: 10.1037/a0032670. Epub 2013 Jun 17. PMID:  
667 23772887; PMCID: PMC3865609.
- 668 30. Richmond VP, McCroskey JC. *Communication: Apprehension, avoidance, and*  
669 *effectiveness.* Pearson; 1997.
- 670 31. Cream A, O'Brian S, Jones M, Block S, Harrison E, Lincoln M, Hewat S, Packman A,  
671 Menzies R, Onslow M. Randomized controlled trial of video self-modeling following  
672 speech restructuring treatment for stuttering. *J Speech Lang Hear Res.* 2010 Aug;53(4):887-  
673 97. doi: 10.1044/1092-4388(2009/09-0080). Epub 2009 Dec 22. PMID: 20029053.
- 674 32. Erickson S, Block S, Menzies R, O'Brian S, Packman A, Onslow M. Standalone Internet  
675 speech restructuring treatment for adults who stutter: A phase I study. *Int J Speech Lang*  
676 *Pathol.* 2016 Aug;18(4):329-40. doi: 10.3109/17549507.2015.1101156. Epub 2015 Nov 7.  
677 PMID: 27063674.
- 678 33. Erickson S, Block S, Menzies R, Onslow M, O'brian S, Packman A. Standalone Internet  
679 speech restructuring treatment for adults who stutter: A pilot study. *J Clin Pract Speech*  
680 *Lang Pathol.* 2012;14(3):118-23.
- 681 34. Menzies RG, Packman A, Onslow M, O'Brian S, Jones M, Helgadóttir FD. In-Clinic and  
682 Standalone Internet Cognitive Behavior Therapy Treatment for Social Anxiety in Stuttering:  
683 A Randomized Trial of iGlebe. *J Speech Lang Hear Res.* 2019 Jun 19;62(6):1614-1624. doi:  
684 10.1044/2019\_JSLHR-S-18-0340. Epub 2019 May 20. PMID: 31112442.
- 685 35. Carey B, O'Brian S, Onslow M, Block S, Jones M, Packman A. Randomized controlled non-  
686 inferiority trial of a telehealth treatment for chronic stuttering: The Camperdown Program.  
687 *Int J Lang Commun Disord.* 2010 Jan-Feb;45(1):108-20. doi: 10.3109/13682820902763944.  
688 PMID: 19424889.
- 689 36. Carey B, O'Brian S, Onslow M, Packman A, Menzies R. Webcam delivery of the  
690 Camperdown Program for adolescents who stutter: A phase I trial. *Lang Speech Hear Serv*

- 691 Sch. 2012 Jul;43(3):370-80. doi: 10.1044/0161-1461(2011/11-0010). Epub 2012 Jan 9.  
692 PMID: 22232423.
- 693 37. Carey B, O'Brian S, Lowe R, Onslow M. Webcam delivery of the Camperdown Program for  
694 adolescents who stutter: a phase II trial. *Lang Speech Hear Serv Sch.* 2014 Oct;45(4):314-  
695 24. doi: 10.1044/2014\_LSHSS-13-0067. PMID: 25091362.
- 696 38. O'Brian S, Onslow M, Cream A, Packman A. The Camperdown Program: outcomes of a  
697 new prolonged-speech treatment model. *J Speech Lang Hear Res.* 2003 Aug;46(4):933-46.  
698 doi: 10.1044/1092-4388(2003/073). PMID: 12959471.
- 699 39. Guntupalli VK, Kalinowski J, Nanjundeswaran C, Saltuklaroglu T, Everhart DE.  
700 Psychophysiological responses of adults who do not stutter while listening to stuttering. *Int J*  
701 *Psychophysiol.* 2006 Oct;62(1):1-8. doi: 10.1016/j.ijpsycho.2005.11.001. Epub 2006 Jan 18.  
702 PMID: 16414137.
- 703 40. Hurst MI, Cooper EB. Employer attitudes toward stuttering. *J Fluency Disord.* 1983 Mar  
704 1;8(1):1-2.
- 705 41. Ruscello DM, Lass NJ, Schmitt JF, Pannbacker MD. Special educators' perceptions of  
706 stutterers. *J Fluency Disord.* 1994 Jun 1;19(2):125-32.
- 707 42. Van Borsel J, Brepoels M, De Coene J. Stuttering, attractiveness and romantic relationships:  
708 the perception of adolescents and young adults. *J Fluency Disord.* 2011 Mar;36(1):41-50.  
709 doi: 10.1016/j.jfludis.2011.01.002. Epub 2011 Jan 20. PMID: 21439422.
- 710 43. Chu SY, Unicomb R, Lee J, Cho KS, St Louis KO, Harrison E, McConnell G. Public  
711 attitudes toward stuttering in Malaysia. *J Fluency Disord.* 2022 Dec;74:105942. doi:  
712 10.1016/j.jfludis.2022.105942. Epub 2022 Nov 7. PMID: 36395547.
- 713 44. Lefort MKR, Erickson S, Block S, Carey B, St Louis KO. Australian attitudes towards  
714 stuttering: A cross-sectional study. *J Fluency Disord.* 2021 Sep;69:105865. doi:  
715 10.1016/j.jfludis.2021.105865. Epub 2021 Jul 22. PMID: 34380103.
- 716 45. Klassen TR. Perceptions of people who stutter: Re-assessing the negative stereotype.  
717 *Percept Mot Skills.* 2001 Apr;92(2):551-9. doi: 10.2466/pms.2001.92.2.551. PMID:  
718 11361320.
- 719 46. White PA, Collins SR. Stereotype formation by inference: a possible explanation for the  
720 "stutterer" stereotype. *J Speech Hear Res.* 1984 Dec;27(4):567-70. doi:  
721 10.1044/jshr.2704.567. PMID: 6521464.

- 722 47. Lass NJ, Ruscello DM, Pannbacker M, Schmitt JF, Middleton GF, Schweppenheiser K. The  
723 perceptions of stutterers by people who stutter. *Folia Phoniatr Logop.* 1995;47(5):247-51.  
724 doi: 10.1159/000266358. PMID: 8563776.
- 725 48. Zhang J, Kalinowski J, Saltuklaroglu T, Hudock D. Stuttered and fluent speakers' heart rate  
726 and skin conductance in response to fluent and stuttered speech. *Int J Lang Commun Disord.*  
727 2010 Nov-Dec;45(6):670-80. doi: 10.3109/13682820903391385. PMID: 20017588.
- 728 49. Zernitsky-Shurka E. Ingroup and outgroup evaluation by disabled individuals. *J Soc*  
729 *Psychol.* 1988 Aug;128(4):465-72. doi: 10.1080/00224545.1988.9713766. PMID: 2972885.
- 730 50. Werle D, Byrd CT. Professors' perceptions and evaluations of students who do and do not  
731 stutter following oral presentations. *Lang Speech Hear Serv Sch.* 2022 Jan 5;53(1):133-149.  
732 doi: 10.1044/2021\_LSHSS-21-00069. Epub 2021 Dec 3. PMID: 34861764.
- 733 51. Byrd, C. T. The Blank Center CARE Model™: A non-ableist approach to treatment.  
734 *ClinicalTrials.gov* identifier: NCT05908123. Updated June 18, 2023.  
735 <https://www.clinicaltrials.gov/ct2/show/NCT05908123>
- 736 52. Riley G. Stuttering severity instrument for children and adults. Pro-Ed; 1994.
- 737 53. Byrd CT, Werle D, Coalson GA. Observer-rated outcomes of Communication-Centered  
738 Treatment (CCT) for adults who stutter. Poster session presented at: Georgia Speech-  
739 Language-Hearing Association. 2023 Feb 24-25. Savannah, GA.
- 740 54. Yairi E, Ambrose NG. Early childhood stuttering for clinicians by clinicians: Pro-Ed; 2005.
- 741 55. Cohen J. Statistical power analysis for the behavioral sciences. Academic press; 2013 Sep 3.
- 742 56. Hosmer Jr DW, Lemeshow S, Sturdivant RX. Applied logistic regression. John Wiley &  
743 Sons; 2013 Apr 1.
- 744 57. Werle D, Byrd CT, Coalson GA. Impact of self-disclosure and communication competence  
745 on perceived listener distraction. *J Commun Disord.* 2023 Apr 25;103:106333. doi:  
746 10.1016/j.jcomdis.2023.106333. Epub ahead of print. PMID: 37130470.
- 747 58. Allport GW. The nature of prejudice. Reading (MA): Addison-Wesley; 1958.
- 748 59. Pettigrew TF, Tropp LR. A meta-analytic test of intergroup contact theory. *J Pers Soc*  
749 *Psychol.* 2006 May;90(5):751-83. doi: 10.1037/0022-3514.90.5.751. PMID: 16737372.
- 750 60. Hughes CD, Gabel RM, Palasik ST. Examining the Relationship Between Perceptions of a  
751 Known Person Who Stutters and Attitudes Toward Stuttering. *Can J Speech Lang Pathol*  
752 *Audio.* 2017 Jul 1;41(3).

- 753 61. Hughes S, Gabel R, Irani F, Schlagheck A. University students' perceptions of the life  
754 effects of stuttering. *J Commun Disord.* 2010 Jan-Feb;43(1):45-60. doi:  
755 10.1016/j.jcomdis.2009.09.002. Epub 2009 Sep 23. PMID: 19836026.
- 756 62. Doody I, Kalinowski J, Armson J, Stuart A. Stereotypes of stutterers and nonstutterers in  
757 three rural communities in Newfoundland. *J Fluency Disord.* 1993 Dec 1;18(4):36.
- 758 63. Foschi M. Gender and double standards for competence. *Gender, interaction, and inequality.*  
759 1992:181-207.
- 760 64. Biernat M, Manis M, Nelson TE. Stereotypes and standards of judgment. *J Pers Soc*  
761 *Psychol.* 1991 Apr;60(4):485.
- 762 65. Biernat M, Kobrynowicz D. Gender- and race-based standards of competence: lower  
763 minimum standards but higher ability standards for devalued groups. *J Pers Soc Psychol.*  
764 1997 Mar;72(3):544-57. doi: 10.1037//0022-3514.72.3.544. PMID: 9120783.
- 765 66. Werle D, Byrd CT. College professors' perceptions of students who stutter and the impact on  
766 comfort approaching professors. *J Fluency Disord.* 2021 Mar;67:105826. doi:  
767 10.1016/j.jfludis.2020.105826. Epub 2020 Dec 25. PMID: 33360979.
- 768 67. Burgoon JK, Manusov V, Guerrero LK. *Nonverbal communication.* New York: Routledge;  
769 2016 Jan 8.
- 770

771 **Fig 1.** Communication competence of an adult who stutters, as rated by untrained observers  
772 before CCT (Pre-Treatment) and after CCT (Post-Treatment)

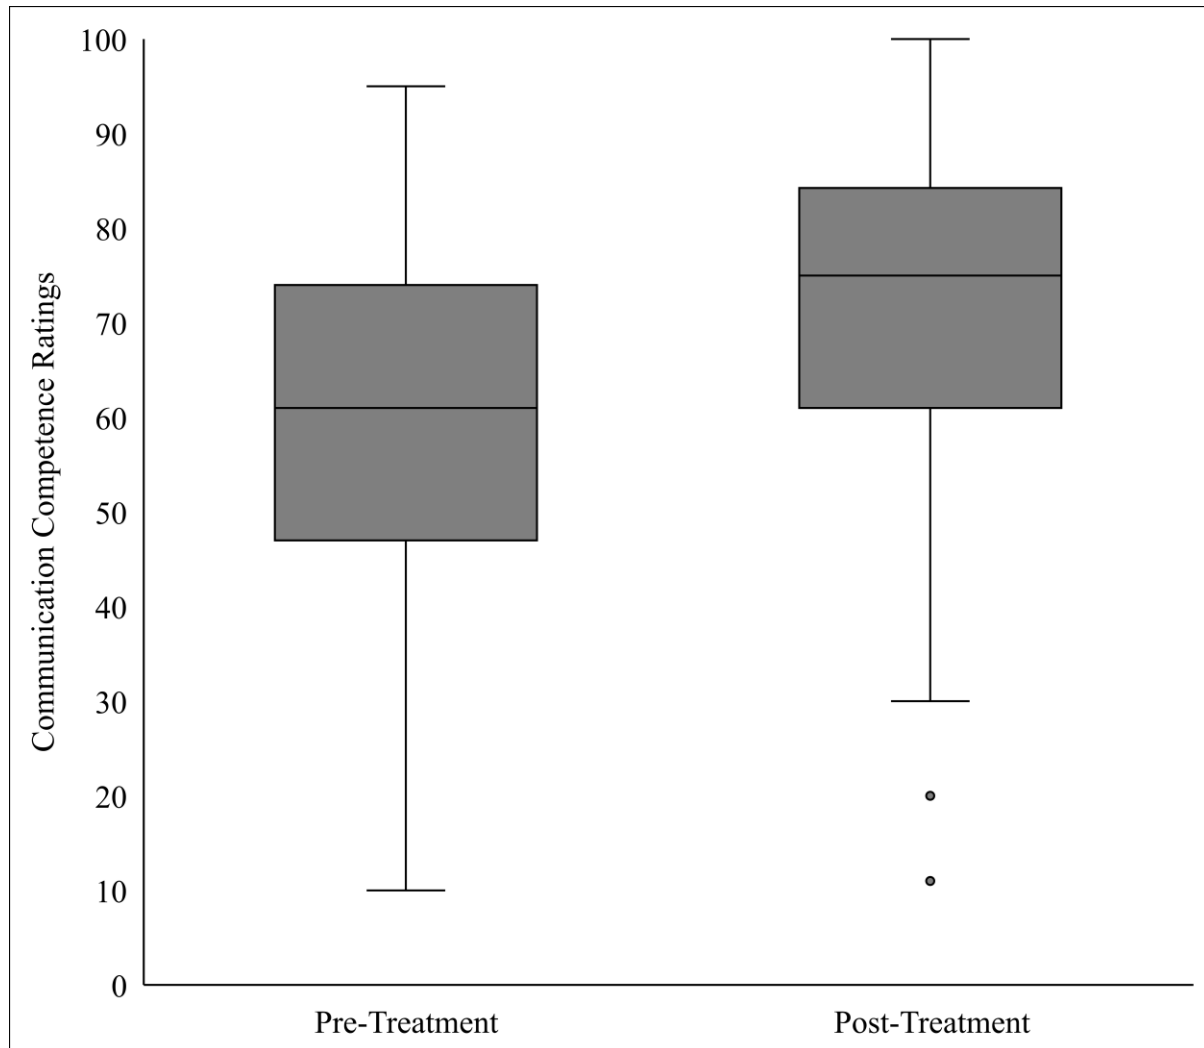

773

774
